# Supplementary material for: Shorter treatment for non-severe tuberculosis in African and Indian children
Source: PubMed Central journal article supplement (PMC7612496; doi:10.1056/nejmoa2104535), 2022-03-10

## SHINE Supplementary tables and figures and list of names

### Contents

|                                                                                                                                                                                 |                      |
|---------------------------------------------------------------------------------------------------------------------------------------------------------------------------------|----------------------|
| SHINE Trial Team.....                                                                                                                                                           | 2                    |
| S1: Additional baseline information of children in SHINE .....                                                                                                                  | 4                    |
| Table S1: Additional baseline characteristics, baseline clinical presentation and AFB smear and culture of children in SHINE .....                                              | 4                    |
| S2: Study disposition, participant flow and participant retention.....                                                                                                          | 6                    |
| Table S2i: Study disposition and participant flow.....                                                                                                                          | 6                    |
| Table S2ii: Retention based on attendance .....                                                                                                                                 | 7                    |
| S3: Safety endpoint results .....                                                                                                                                               | 8                    |
| Table S3i: Primary safety endpoint, on-treatment grade 3 or higher adverse events up to 30 days after last dose – event type .....                                              | 8                    |
| Table S3ii: Serious adverse events .....                                                                                                                                        | 9                    |
| Table S3iii: Additional information on Primary safety endpoint events* serious adverse events (SAEs), deaths and Suspected bacterial infections requiring hospitalisation ..... | 10                   |
| S4: Adverse Drug Reactions .....                                                                                                                                                | 12                   |
| Table S4: Listing of Adverse Drug Reactions* .....                                                                                                                              | 12                   |
| S5: Deaths .....                                                                                                                                                                | 14                   |
| Table S5: Listing of all deaths.....                                                                                                                                            | 14                   |
| S6: Unfavourable outcomes in mITT.....                                                                                                                                          | <a href="#">1718</a> |
| Table S6: Listing of all unfavourable outcomes in mITT .....                                                                                                                    | <a href="#">1718</a> |
| S7: Cost-effectiveness results .....                                                                                                                                            | <a href="#">2021</a> |
| Table S7i: Cost-effectiveness results.....                                                                                                                                      | <a href="#">2021</a> |
| Table S7ii: Unit cost estimates.....                                                                                                                                            | <a href="#">2223</a> |
| S8: Primary endpoint stratified by microbiological confirmation.....                                                                                                            | <a href="#">2526</a> |
| Table S8i: Microbiologically confirmed.....                                                                                                                                     | <a href="#">2526</a> |
| Table S8ii: Not microbiologically confirmed .....                                                                                                                               | <a href="#">2526</a> |
| S9: Primary endpoint results by PP and ITT .....                                                                                                                                | <a href="#">2627</a> |
| Table 9i Primary efficacy analysis results (PP) .....                                                                                                                           | <a href="#">2627</a> |
| Table 9ii Primary efficacy analysis results (ITT) .....                                                                                                                         | <a href="#">2728</a> |
| Figure S1: Adherence - the number of daily doses taken in each phase for all children.....                                                                                      | <a href="#">2829</a> |
| Figure S2: Time to unfavourable outcome (mITT) .....                                                                                                                            | <a href="#">2930</a> |
| Figure S3: Time to death (ITT).....                                                                                                                                             | <a href="#">3031</a> |
| Figure S4: Subgroup Analyses of Primary Efficacy Endpoint .....                                                                                                                 | <a href="#">3132</a> |

## SHINE Trial Team

### **MRC CTU at UCL:**

Diana M. Gibb, Anna Turkova, Angela M. Crook, Louise Choo, Genevieve Wills, Margaret J. Thomason, Jaqueline Teera, Ellen Owen- Powell, Kristen LeBeau, David Baptiste, Charlotte McGowan, Moira Spyer

### **University Teaching Hospital, Children's Hospital, Lusaka, Zambia:**

Chishala Chabala, Veronica Mulenga, Joyce Lungu, Monica Kapasa, Kevin Zimba, Khozya Zyambo, Chalilwe Chungu, Chimuka Tembo, Sharon Kunda, Ellen Shingalili, Semy Zulu, Terence Chipoya, Habulembe Mwanakalanga, Elias Chambela, Jessy M. Hankombo, Mox Malama Kalumbi, Daniel Chola, Stephen Malama

### **Makerere University - Johns Hopkins University Research Collaboration, Kampala, Uganda:**

Eric Wobudeya, Philippa Musoke, Mboizi Robert Baldwin, Winnie Nansamba, Mark Ssenyonga, Willy Ssengooba, Gerald Businge

### **Desmond Tutu TB Centre, Stellenbosch University, South Africa:**

Anneke C.Hesseling, Megan Palmer, Marieke M. van der Zalm, Jessica Workman, Anne-Marie Demers, Simon Schaaf, Robert Gie, Elisabetta Walters, Warren Zimri, Graeme Hoddinott, Anneen van Deventer, Pierre Goussard, Julie Morrison

### **Byramjee Jeejeebhoy Government Medical College, Pune, India:**

Vidya Mave (PI), Aarti Avinash Kinikar, Priyanka Raichur, Aparna Nijampurkar, Sameer Khan

### **Chennai, India:**

#### **Indian Council of Medical Research, National Institute for Research in Tuberculosis, Chennai:**

Syed Hissar (PI), Bency Joseph, Perumal Kannabiran Bhavani, G Prathiksha, Dhanaraj Baskaran, NS Gomathi, V Mythily, Hemanth Kumar, Silambu Chelvi, L Sekar, Luke Hanna, K Ramesh, Hema Latha, S Bharathi, Parveen Banu, Dino Xavier, Manjith Kumar, K Guru, Sasi Kumar, A Kesavan, A Gunasundari, G Mangalambal, Valarmathi Nagarajan, Shakeela Shankar, R Selvi, S Vaishnavi, Krishna Yadav, R Supriya, Hema Giranab, A Seetha, Stella Mary, S Gopika, S Rohini, M Revathy

#### **Institute of Child Health and Hospital for Children, Chennai**

Sarath Balaji, S Elilarasi

#### **Government Stanley Medical College and Hospital, Chennai**

J Ganesh, MA Aravind

### **Local Site Monitors:**

Sylvia Mulambo, Hope Mwanyungwi, Dharati Tapse, Manasi Sane, Amina Abdullah, Sarah Nakalanzi, Cynthia Mukisa Williams

### **Division of Clinical Pharmacology, University of Cape Town:**

Helen McIlleron

**Radboud university medical center, Nijmegen, Netherlands:**

Rob Aarnoutse

**University of York:**

Paul Revill, James Love-Koh, Simon Walker

**SHINE Trial Steering Committee Members**

Peter Mugenyi (Chair), Janet Darbyshire, Polly Clayden, Peter Donald, Varinder Singh, Malgosia Grzemska\*, Soumya Swaminathan,

\*Replaced by Sabine Verkuil and Annemieke Brands in March 2020

**SHINE Independent Data Monitoring Committee Members**

Tim Peto (Chair), Alwyn Mwinga, Katherine Fielding

**SHINE Endpoint Review Committee Members**

Stephen M. Graham (Chair), Steven B. Welch, James A. Seddon, Elizabeth Whittaker, Suzanne Anderson, Louis Grandjean

S1: Additional baseline information of children in SHINE

**Table S1: Additional baseline characteristics, baseline clinical presentation and AFB smear and culture of children in SHINE**

|                                                                 |           | <b>16 weeks</b> | <b>24 weeks</b> | <b>Total</b>    |
|-----------------------------------------------------------------|-----------|-----------------|-----------------|-----------------|
|                                                                 |           | <b>(N=602)</b>  | <b>(N=602)</b>  | <b>(N=1204)</b> |
| <b>Age group</b>                                                | ≤10 years | 521 (87)        | 516 (86)        | 1037 (86)       |
|                                                                 | >10 years | 81 (13)         | 86 (14)         | 167 (14)        |
| <b>Weight-for-height Z score (WHZ)<sup>+</sup></b>              | N         | 475             | 476             | 951             |
|                                                                 | Median    | -0.28           | -0.22           | -0.24           |
|                                                                 | IQR       | (-1.16, 0.56)   | (-1.10, 0.56)   | (-1.11, 0.56)   |
|                                                                 | Min, Max  | (-4.34, 4.38)   | (-5.09, 6.94)   | (-5.09, 6.94)   |
| <b>Weight-for-age Z score (WAZ)<sup>++</sup></b>                | N         | 602             | 602             | 1204            |
|                                                                 | Median    | -1.20           | -1.12           | -1.15           |
|                                                                 | IQR       | (-2.12, -0.29)  | (-2.10, -0.37)  | (-2.11, -0.34)  |
|                                                                 | Min, Max  | (-6.71, 2.76)   | (-6.30, 3.01)   | (-6.71, 3.01)   |
| <b>Height-for-age Z score (HAZ)<sup>++</sup></b>                | N         | 602             | 602             | 1204            |
|                                                                 | Median    | -1.51           | -1.39           | -1.42           |
|                                                                 | IQR       | (-2.33, -0.61)  | (-2.33, -0.59)  | (-2.33, -0.60)  |
|                                                                 | Min, Max  | (-6.09, 3.27)   | (-13.37, 5.12)  | (-13.37, 5.12)  |
| <b>N with smear performed</b>                                   |           | <b>602</b>      | <b>601</b>      | <b>1203</b>     |
| No AFB seen on respiratory samples                              |           | 602 (100)       | 600 (<100)      | 1202 (<100)     |
| 'Scanty' on respiratory samples                                 |           | 0               | 1 (<1)*         | 1 (<1)*         |
| <b>N with Xpert MTB/RIF performed</b>                           |           | <b>601</b>      | <b>601</b>      | <b>1202</b>     |
| N with MTB detected                                             |           | 45 (7)          | 40 (7)          | 85 (7)          |
| <b>N with culture performed<sup>o</sup></b>                     |           | <b>602</b>      | <b>602</b>      | <b>1204</b>     |
| Culture positive for MTB                                        |           | <b>71 (12)</b>  | <b>75 (12)</b>  | <b>146 (12)</b> |
| Negative                                                        |           | 484 (80)        | 493 (82)        | 977 (81)        |
| Positive for NTM                                                |           | 33 (5)          | 27 (4)          | 60 (5)          |
| Contaminated                                                    |           | 14 (2)          | 7 (1)           | 21 (2)          |
| <b>Total Number of Respiratory Samples**</b>                    |           | <b>1222</b>     | <b>1215</b>     | <b>2437</b>     |
| Number of Respiratory Samples with MTB detected                 |           | <b>34</b>       | <b>32</b>       | <b>66</b>       |
| Of those with MTB detected, GeneXpert semi-quantitative result: |           |                 |                 |                 |
| High                                                            |           | 0               | 0               | 0               |
| Medium                                                          |           | 0               | 0               | 0               |
| Low                                                             |           | 6               | 5               | 11              |
| Very low                                                        |           | 26              | 25              | 51              |

Data presented as number of participants (%), unless otherwise stated. IQR=interquartile range \*Weight-for-height Z score is defined for children up to age 10 only. We present a combined variable for weight-for-height 65-120 cm & weight-for-length 45-110 cm from WHO Child Growth Charts and WHO Reference 2007 Charts. \*\*Weight-for Age and Height-for Age Z-Scores use UK WHO Term Growth Reference for all term births (gestation 37-42 weeks). Microbiological results on more than one sample per participant are combined.

AFB=acid-fast bacilli, NTM=non-tuberculous mycobacteria; LJ=Lowenstein Jensen solid culture medium, MGIT =Mycobacteria growth indicator tube liquid culture system. \*\*All respiratory samples are Gastric Aspirate, Gastric Washing, Induced Sputum, Expecterated Sputum\*Late screen failure. <sup>o</sup>Culture definitions: *Positive for MTB (from MGIT or LJ)* include participants with at least 1 positive result for MTB from either MGIT or LJ sample. *Positive for NTM* include participants with positive result for NTM and negative result for MTB. *Contaminated* include participants with all culture results reported as contaminated and not positive for MTB or NTM. *Negative* include participants with a negative result for MTB and who were not positive for NTM (could include participants with sample that was contaminated or had technical problem if at least 1 result was negative for MTB). Microbiological confirmation was from respiratory samples (gastric aspirate/washing, induced or expecterated sputum) and fine needle aspiration of enlarged lymph nodes and was defined as positive for *M. tuberculosis* by culture or Xpert MTB/RIF assay. <sup>‡</sup>Participants did not have a cough for more than 2 weeks or peripheral lymph node(s) suggestive of TB.

S2: Study disposition, participant flow and participant retention

Table S2i: Study disposition and participant flow

|                                                          | 16 weeks   | 24 weeks   | Total       |
|----------------------------------------------------------|------------|------------|-------------|
| <b>Randomised</b>                                        | <b>602</b> | <b>602</b> | <b>1204</b> |
| <b>Number of children who did not reach Week 8</b>       | <b>8</b>   | <b>10</b>  | <b>18</b>   |
| <i>Death</i>                                             | 4          | 5          | 9           |
| <i>Lost to Follow-up</i>                                 | 2          | 2          | 4           |
| <i>Withdrawals</i>                                       | 2          | 3          | 5           |
| <b>Number of children who reached Week 8 but not 16</b>  | <b>4</b>   | <b>3</b>   | <b>7</b>    |
| <i>Death</i>                                             | 1          | 1          | 2           |
| <i>Lost to Follow-up</i>                                 | 1          | 1          | 2           |
| <i>Withdrawals</i>                                       | 2          | 1          | 3           |
| <b>Number of children who reached Week 16 but not 24</b> | <b>2</b>   | <b>4</b>   | <b>6</b>    |
| <i>Death</i>                                             | 2          | 3          | 5           |
| <i>Lost to Follow-up</i>                                 | 0          | 1          | 1           |
| <i>Withdrawals</i>                                       | 0          | 0          | 0           |
| <b>Number of children who reached Week 24 but not 72</b> | <b>13</b>  | <b>15</b>  | <b>28</b>   |
| <i>Death</i>                                             | 5          | 9          | 14          |
| <i>Lost to Follow-up</i>                                 | 8          | 6          | 14          |
| <i>Withdrawals</i>                                       | 0          | 0          | 0           |
| <b>Number of children who reached Week 72</b>            | <b>575</b> | <b>569</b> | <b>1144</b> |
| <i>Death</i>                                             | 0          | 1          | 1           |
| <i>Lost to Follow-up</i>                                 | 0          | 0          | 0           |
| <i>Withdrawals</i>                                       | 0          | 0          | 0           |

All randomised children had a date of first dose. Numbers are based on Final Visit form

**Table S2ii: Retention based on attendance**

|                   | <b>16 weeks</b> | <b>24 weeks</b> | <b>Total</b> |
|-------------------|-----------------|-----------------|--------------|
| <b>Randomised</b> | <b>602</b>      | <b>602</b>      | <b>1204</b>  |
| Week 2 Expected   | 600             | 598             | 1198         |
| Week 2 Attended   | 590 (98)        | 591 (99)        | 1181 (99)    |
| Week 4 Expected   | 597             | 596             | 1193         |
| Week 4 Attended   | 591 (99)        | 587 (98)        | 1178 (99)    |
| Week 8 Expected   | 595             | 593             | 1188         |
| Week 8 Attended   | 587 (99)        | 584 (98)        | 1171 (99)    |
| Week 12 Expected  | 593             | 592             | 1185         |
| Week 12 Attended  | 584 (98)        | 582 (98)        | 1166 (98)    |
| Week 16 Expected  | 592             | 592             | 1184         |
| Week 16 Attended  | 578 (98)        | 572 (97)        | 1150 (97)    |
| Week 20 Expected  | 591             | 590             | 1181         |
| Week 20 Attended  | 553 (94)        | 573 (97)        | 1126 (95)    |
| Week 24 Expected  | 591             | 589             | 1180         |
| Week 24 Attended  | 550 (93)        | 565 (96)        | 1115 (94)    |
| Week 28 Expected  | 589             | 587             | 1176         |
| Week 28 Attended  | 554 (94)        | 559 (95)        | 1113 (95)    |
| Week 36 Expected  | 587             | 584             | 1171         |
| Week 36 Attended  | 551 (94)        | 549 (94)        | 1100 (94)    |
| Week 48 Expected  | 587             | 581             | 1168         |
| Week 48 Attended  | 546 (93)        | 525 (90)        | 1071 (92)    |
| Week 60 Expected  | 586             | 581             | 1167         |
| Week 60 Attended  | 531 (91)        | 519 (89)        | 1050 (90)    |
| Week 72 Expected  | 586             | 579             | 1165         |
| Week 72 Attended  | 560 (96)        | 550 (95)        | 1110 (95)    |

Data presented as number of participants (%), unless otherwise stated. Attendance is based on the Nurse case report form (CRF) entered on the study database for each visit. Expected visits are calculated using the number of nurse forms expected to be on the database (from date of randomisation to upper date of each visit window). Children would be deemed “not expected” after either death or formal withdrawal from the trial. Percentage attendance by visit is calculated as a proportion of expected visits.

### S3: Safety endpoint results

**Table S3i: Primary safety endpoint, on-treatment grade 3 or higher adverse events up to 30 days after last dose – event type**

|                                                              | 16 weeks   | 24 weeks   | Total       |
|--------------------------------------------------------------|------------|------------|-------------|
| <b>Randomised</b>                                            | <b>602</b> | <b>602</b> | <b>1204</b> |
| <b>No. of Grade 3, 4 or 5 adverse events</b>                 | <b>49</b>  | <b>66</b>  | <b>115</b>  |
| Anaemia                                                      | 0          | 5 (8)      | 5 (4)       |
| Bacteraemia, septicaemia                                     | 2 (4)      | 1 (2)      | 3 (3)       |
| Diarrhoea                                                    | 5 (10)     | 2 (3)      | 7(6)        |
| Epilepsy, seizures, febrile convulsions                      | 3 (6)      | 3 (5)      | 6 (5)       |
| Liver                                                        | 4 (8)      | 7 (11)     | 11 (10)     |
| Malaria                                                      | 2 (4)      | 1(2)       | 3 (3)       |
| Neutropenia                                                  | 2 (4)      | 2 (3)      | 4(3)        |
| Other*                                                       | 15 (31)    | 15 (23)    | 30 (26)     |
| Pneumonia/Chest infections/Lower respiratory tract infection | 11 (22)    | 18 (27)    | 29 (25)     |
| Rash, hypersensitivity reaction                              | 2 (4)      | 1 (2)      | 3 (3)       |
| Severe malnutrition                                          | 1 (2)      | 4 (6)      | 5 (4)       |
| Trauma/accidental injury                                     | 0          | 1 (2)      | 1 (1)       |
| Upper respiratory tract infection                            | 2 (4)      | 3 (5)      | 5 (4)       |
| Urinary tract infection                                      | 0          | 3 (5)      | 3 (3)       |

Data presented as number of participants (%), unless otherwise stated. \* “Other” events included: asthma, chicken pox, tumours, abnormal lab values, athletes foot, dental abscess, measles, cataract



**Table S3ii: Serious adverse events**

| <b>Randomised</b>                     | <b>4 Month</b> | <b>6 Month</b> | <b>Total</b>    |
|---------------------------------------|----------------|----------------|-----------------|
|                                       | <b>602</b>     | <b>602</b>     | <b>1204</b>     |
| <b>No. of SAEs</b>                    | <b>88</b>      | <b>104</b>     | <b>192</b>      |
| <b>Patients with at least one SAE</b> | <b>75 (12)</b> | <b>75 (12)</b> | <b>150 (12)</b> |
| <i>Before 16 weeks</i>                |                |                |                 |
| No. of SAEs                           | 35             | 50             | 85              |
| Patients with at least one SAE        | 33             | 40             | 73              |
| <i>After 16 weeks</i>                 |                |                |                 |
| No. of SAEs                           | 53             | 54             | 107             |
| Patients with at least one SAE        | 47             | 44             | 91              |

Patients can appear in both before and after 16 week breakdown

**Table 3iii: Additional information on Primary safety endpoint events\* serious adverse events (SAEs), deaths and Suspected bacterial infections requiring hospitalisation**

| Randomised                                                                                         | 16 weeks<br>(N=602) | 24<br>weeks<br>(N=602) | Total<br>(N=1204) |
|----------------------------------------------------------------------------------------------------|---------------------|------------------------|-------------------|
| <b>Participants with at least one DAIDS grade 3, 4 or 5 adverse event <math>\alpha</math></b>      | <b>47 (8)</b>       | <b>48 (8)</b>          | <b>95 (8)</b>     |
| Participants with grade 5 adverse event (Death)                                                    | 8                   | 9                      | 17                |
| Participants with grade 4 adverse event                                                            | 7                   | 12                     | 19                |
| Participants with grade 3 adverse event                                                            | 32                  | 27                     | 59                |
| <b>Participants with at least one grade 3, 4 or 5 adverse events occurring before 16 weeks</b>     | <b>33 (5)</b>       | <b>40 (7)</b>          | <b>73 (6)</b>     |
| Participants with grade 5 adverse event (Death) before 16 weeks                                    | 6                   | 9                      | 15                |
| Participants with grade 4 adverse event before 16 weeks                                            | 6                   | 10                     | 16                |
| Participants with grade 3 adverse event before 16 weeks                                            | 21                  | 21                     | 42                |
| <b>Participants with at least one grade 3, 4 or 5 adverse event occurring after week 16</b>        | <b>14 (2)</b>       | <b>12 (2)</b>          | <b>26 (2)</b>     |
| Participants with grade 5 adverse event (Death)                                                    | 2                   | 0                      | 2                 |
| Participants with grade 4 adverse event                                                            | 1                   | 2                      | 3                 |
| Participants with grade 3 adverse event                                                            | 11                  | 10                     | 21                |
| Events described as bacterial infections requiring hospitalisation before week 16                  | 14                  | 15                     | 29                |
| Participants with at least episode of bacterial infection requiring hospitalisation before week 16 | 13                  | 13                     | 26                |
| Events described as bacterial infections requiring hospitalisation after week 16                   | 26                  | 25                     | 51                |

|                                                                                                       |    |    |    |
|-------------------------------------------------------------------------------------------------------|----|----|----|
| Participants with at least one episode of bacterial infection requiring hospitalisation after week 16 | 26 | 19 | 45 |
|-------------------------------------------------------------------------------------------------------|----|----|----|

Data presented as number of events or number of participants with at least one event (%) as indicated. DAIDS = Division of AIDS table for grading the severity of adult and paediatric adverse events; SAE=serious adverse event, defined using International Conference on Harmonisation-Good Clinical Practice (ICH-GCP) definitions as adverse event resulting in death, is life-threatening, requires hospitalisation or prolongs existing hospitalisation, results in persistent or significant disability or incapacity, consists of a congenital anomaly or birth defect, or considered to be another important medical condition.

\* Primary safety endpoint events include on-treatment grade 3 or higher adverse events up to 30 days after the last dose of study drugs.

⌘ Participants can appear in both before and after 16 week breakdown.

¥ Adverse drug reactions were defined as being possibly, probably or definitely related to the trial drugs. Further information on these can be found in the listing in the supplementary material and include event type and information on treatment discontinuation. Data presented as number of events or number of participants with at least one event (%) as indicated. \*Participants can appear in both before and after 16 week breakdown

## S4: Adverse Drug Reactions

**Table S4: Listing of Adverse Drug Reactions\***

| #                 | Rand. Date | Treat ment | Date of Onset | Date of Resolution | Summarised Name of Event         | Drug       | Causality  | Action Taken on Form     | Highest Event Grade | Time to event (days) |
|-------------------|------------|------------|---------------|--------------------|----------------------------------|------------|------------|--------------------------|---------------------|----------------------|
| 1 <sup>1</sup>    | 07-Dec-17  | 24 weeks   | 10-Dec-17     | 02-Jan-18          | Vomiting, Raised ALT, Raised AST | H, E       | Definitely | Reduction                | 3                   | 4                    |
|                   |            |            |               |                    |                                  | Z, R       | Definitely | Interrupted <sup>1</sup> |                     |                      |
| 2                 | 18-Aug-17  | 24 weeks   | 22-Aug-17     | 25-Sep-17          | Raised ALT, Raised AST           | R          | Possibly   | Interrupted              | 4                   | 5                    |
| 3                 | 01-Jan-18  | 24 weeks   | 13-Jan-18     | 01-Feb-18          | Raised ALT                       | H, R, Z    | Possibly   | Interrupted              | 3                   | 13                   |
| 4                 | 14-Jun-17  | 16 weeks   | 28-Jun-17     | 13-Jul-17          | Acute hepatitis                  | R          | Possibly   | Reduction                | 4                   | 15                   |
|                   |            |            |               |                    |                                  | H, Z       | Possibly   | Interrupted              |                     |                      |
| 5                 | 19-Jan-18  | 24 weeks   | 02-Feb-18     | 09-Feb-18          | Raised ALT                       | H, R, Z    | Probably   | Interrupted              | 3                   | 15                   |
| 6                 | 11-Jul-18  | 16 weeks   | 03-Aug-18     | 10-Aug-18          | Rash (urticaria)                 | H, R, Z, E | Possibly   | Interrupted <sup>1</sup> | 3                   | 24                   |
| 7                 | 02-Jun-17  | 24 weeks   | 25-Jun-17     | 11-Jul-17          | Hypersensitivity reaction        | H, R, Z    | Possibly   | Interrupted              | 3                   | 24                   |
| 8                 | 08-Mar-17  | 24 weeks   | 04-Apr-17     | 20-Apr-17          | Raised ALT                       | H, R, Z    | Probably   | None                     | 3                   | 28                   |
| 9                 | 25-Aug-16  | 16 weeks   | 21-Sep-16     | 11-Oct-16          | Raised creatinine                | H, R       | Possibly   | None                     | 4                   | 28                   |
| 10 <sup>2,3</sup> | 03-Feb-17  | 24 weeks   | 03-Mar-17     | 11-Apr-17          | Raised ALT, Raised AST           | H, R, Z    | Possibly   | Stopped <sup>2,3</sup>   | 4                   | 29                   |

| #                 | Rand. Date | Treatment | Date of Onset | Date of Resolution | Summarised Name of Event          | Drug       | Causality  | Action Taken on Form     | Highest Event Grade | Time to event (days) |
|-------------------|------------|-----------|---------------|--------------------|-----------------------------------|------------|------------|--------------------------|---------------------|----------------------|
| 11 <sup>3</sup>   | 19-Jul-18  | 24 weeks  | 18-Aug-18     | 03-Sep-18          | Acute hepatitis                   | H, R, Z    | Probably   | Interrupted <sup>3</sup> | 4                   | 31                   |
| 12                | 17-Oct-17  | 24 weeks  | 20-Nov-17     | 27-Nov-17          | Sickle cell crisis                | H, R, Z, E | Possibly   | None                     | 4                   | 35                   |
| 13 <sup>2,3</sup> | 12-Apr-18  | 24 weeks  | 25-May-18     | 19-Jul-18          | Acute hepatitis                   | H, R, Z    | Possibly   | Stopped <sup>2,3</sup>   | 4                   | 44                   |
| 14                | 13-Jun-17  | 16 weeks  | 08-Aug-17     | 28-Aug-17          | Colour vision disturbance         | E          | Definitely | None¥                    | 2                   | 57                   |
| 15                | 24-Aug-17  | 16 weeks  | 14-Nov-17     | 21-Nov-17          | Anaemia with no clinical symptoms | R          | Possibly   | None                     | 1                   | 83                   |
| 16                | 20-Jun-17  | 16 weeks  | 10-Oct-17     | 07-Nov-17          | Raised ALT                        | H, R       | Probably   | None                     | 4                   | 113                  |
| 17                | 08-06-17   | 24 weeks  | 24-Nov-17     | 21-Dec-17          | Raised ALT                        | H, R       | Probably   | None                     | 4                   | 170                  |

\* Events occurring on treatment or within 30 days of the last dose of study drugs. Adverse drug reactions were defined as being possibly, probably or definitely related to the trial drugs. <sup>1</sup> Reported as interrupted but subsequently stopped according to other data sources; <sup>2</sup> reported as stopped but subsequently restarted according to TB treatment log; <sup>3</sup> treatment restarted without PZA. ¥ No action taken as the event occurred at day 57 at the end of treatment

## S5: Deaths

**Table S5: Listing of all deaths**

| #  | Randomisation Date | Treatment | HIV status/age/country             | Primary cause of Death (local)   | ERC Adjudicated Primary Cause of Death | Related to TB (ERC)     | Related to Drug (Investigator) | Days to death |
|----|--------------------|-----------|------------------------------------|----------------------------------|----------------------------------------|-------------------------|--------------------------------|---------------|
| 1  | 02-Jun-17          | 16 weeks  | Negative/6 months/<br>Uganda       | Pneumonia no organism identified | Pneumonia no organism identified       | Possibly                | Unrelated                      | 12            |
| 2  | 18-Aug-16          | 24 weeks  | Negative/11 years/<br>South Africa | Bronchospasm/Asthma              | Bronchospasm/Asthma                    | Possibly                | Unrelated                      | 14            |
| 3  | 21-Feb-17          | 24 weeks  | Positive/1 year/Uganda             | Congestive cardiac failure       | Anaemia with clinical symptoms         | Unrelated/<br>Unlikely  | Possibly                       | 19            |
| 4  | 15-Aug-16          | 16 weeks  | Positive/5 months/<br>Zambia       | Severe malnutrition              | Pneumonia - other bacterial            | Definitely/<br>Probably | Unrelated                      | 22            |
| 5  | 19-May-17          | 16 weeks  | Negative/1 year/Uganda             | Pneumonia no organism identified | Death, cause unknown                   | Unknown                 | Unrelated                      | 23            |
| 6  | 19-May-17          | 24 weeks  | Positive/4 months/Zambia           | Unknown                          | Death, cause unknown                   | Unrelated/<br>Unlikely  | Unlikely                       | 25            |
| 7  | 07-Jun-18          | 24 weeks  | Negative/8 months/Uganda           | Unknown                          | Traumatic                              | Unrelated/<br>Unlikely  | Unrelated                      | 54            |
| 8  | 13-Jan-17          | 24 weeks  | Negative/6 months/Uganda           | Unknown                          | Death, cause unknown                   | Unknown                 | Unlikely                       | 55            |
| 9  | 01-Dec-16          | 16 weeks  | Negative/10 months/Uganda          | Unknown                          | Death, cause unknown                   | Unknown                 | Unlikely                       | 55            |
| 10 | 23-Feb-17          | 24 weeks  | Positive/4 months/Zambia           | Severe malnutrition              | Chronic diarrhoea not investigated     | Possibly                | Unlikely                       | 65            |

| #  | Randomisation Date | Treatment | HIV status/age/country   | Primary cause of Death (local)          | ERC Adjudicated Primary Cause of Death        | Related to TB (ERC)    | Related to Drug (Investigator) | Days to death |
|----|--------------------|-----------|--------------------------|-----------------------------------------|-----------------------------------------------|------------------------|--------------------------------|---------------|
| 11 | 20-Feb-17          | 16 weeks  | Positive/4 months/Zambia | Septicaemia with organism (unspecified) | Presumed septicaemia/bacteremia - no organism | Possibly               | Unlikely                       | 87            |
| 12 | 03-Mar-17          | 16 weeks  | Negative/5 years/Uganda  | Unknown                                 | Epilepsy, fits, convulsions                   | Possibly               | Unrelated                      | 124           |
| 13 | 24-Aug-17          | 16 weeks  | Positive/1 years/Zambia  | Congestive cardiac failure              | Pneumonia - other bacterial                   | Unrelated/<br>Unlikely | Unrelated                      | 130           |
| 14 | 14-Nov-16          | 24 weeks  | Positive/6 months/Zambia | Pneumonia no organism identified        | Pneumonia no organism identified              | Possibly               | Unlikely                       | 140           |
| 15 | 20-Nov-17          | 24 weeks  | Negative/8 months/Uganda | Traumatic                               | Traumatic                                     | Unrelated/<br>Unlikely | Unrelated                      | 152           |
| 16 | 20-Dec-17          | 24 weeks  | Positive/1 years/Zambia  | Severe malnutrition                     | Severe malnutrition                           | Unrelated/<br>Unlikely | Possibly                       | 162           |
| 17 | 03-Feb-17          | 24 weeks  | Positive/1 years/Uganda  | Unknown                                 | Death, cause unknown                          | Unknown                | Unrelated                      | 186           |
| 18 | 09-Jul-18          | 16 weeks  | Negative/2 years/Uganda  | Acute respiratory failure               | Other Solid tumour                            | Unrelated/<br>Unlikely | Unrelated                      | 198           |
| 19 | 02-Jun-17          | 24 weeks  | Negative/7 years/Uganda  | Hypotension/shock/toxic shock           | Congestive cardiac failure                    | Possibly               | Unrelated                      | 203           |
| 20 | 09-Nov-16          | 16 weeks  | Positive/9 months/Zambia | Acute diarrhoea not investigated        | Acute diarrhoea not investigated              | Unrelated/<br>Unlikely | Unrelated                      | 214           |
| 21 | 05-Apr-17          | 24 weeks  | Negative/1 years/Uganda  | Hypotension/shock/toxic shock           | Pneumonia no organism identified              | Possibly               | Unrelated                      | 227           |

| #  | Randomisation Date | Treatment | HIV status/age/country   | Primary cause of Death (local)               | ERC Adjudicated Primary Cause of Death                | Related to TB (ERC)     | Related to Drug (Investigator) | Days to death |
|----|--------------------|-----------|--------------------------|----------------------------------------------|-------------------------------------------------------|-------------------------|--------------------------------|---------------|
| 22 | 16-Nov-17          | 16 weeks  | Negative/7 months/Zambia | Unknown                                      | Death, cause unknown                                  | Unrelated/<br>Unlikely  | Unlikely                       | 229           |
| 23 | 19-May-17          | 24 weeks  | Negative/1 years/Uganda  | Hypotension/shock/toxic shock                | Hypotension/shock/toxic shock                         | Unrelated/<br>Unlikely  | Unrelated                      | 241           |
| 24 | 18-Jul-16          | 24 weeks  | Positive/3 months/Zambia | Unknown                                      | Acute respiratory failure                             | Possibly                | Unrelated                      | 257           |
| 25 | 30-Aug-17          | 16 weeks  | Negative/6 months/Zambia | Unknown                                      | Epilepsy, fits, convulsions                           | Possibly                | Unrelated                      | 268           |
| 26 | 24-May-17          | 24 weeks  | Negative/2 months/Uganda | Disseminate Intravascular coagulopathy (DIC) | Presumed septicaemia/bacteremia - no organism         | Unrelated/<br>Unlikely  | Unrelated                      | 309           |
| 27 | 03-May-18          | 24 weeks  | Negative/2 years/Zambia  | Unknown                                      | MISSING                                               | MISSING                 | Unrelated                      | 318           |
| 28 | 09-Oct-17          | 24 weeks  | Positive/1 years/Zambia  | Unknown                                      | Tuberculosis - pulmonary - smear negative or not done | Definitely/<br>Probably | Unlikely                       | 335           |
| 29 | 12-Jul-18          | 16 weeks  | Negative/9 months/Uganda | Hypotension/shock/toxic shock                | Hypotension/shock/toxic shock                         | Unrelated/<br>Unlikely  | Unrelated                      | 408           |
| 30 | 14-Mar-17          | 24 weeks  | Positive/1 years/Uganda  | Acute respiratory failure                    | Pneumonia no organism identified                      | Possibly                | Unrelated                      | 468           |
| 31 | 20-Apr-18          | 24 weeks  | Negative/10 years/Uganda | Traumatic                                    | Traumatic                                             | Unrelated/<br>Unlikely  | Unrelated                      | 514           |



S6: Unfavourable outcomes in mITT

Table S6: Listing of all unfavourable outcomes in mITT

| #  | Randomisation Date | Treatment | HIV status/age/country | Age      | Site country | mITT unfavourable reason                           | Days to event |
|----|--------------------|-----------|------------------------|----------|--------------|----------------------------------------------------|---------------|
| 1  | 28-Jun-17          | 16 weeks  | Negative               | 1 year   | Pune         | Official treatment extension                       | 112           |
| 2  | 05-Oct-17          | 16 weeks  | Positive               | 4 years  | Zambia       | Official treatment extension                       | 113           |
| 3  | 23-Mar-18          | 16 weeks  | Negative               | 3 years  | Pune         | Event after week 16: TB event                      | 117           |
| 4  | 03-Mar-17          | 16 weeks  | Negative               | 5 years  | Uganda       | Event after week 16: Death                         | 124           |
| 5  | 24-Aug-17          | 16 weeks  | Positive               | 1 year   | Zambia       | Event after week 16: Death                         | 130           |
| 6  | 14-Nov-16          | 24 weeks  | Positive               | 6 months | Zambia       | Event after week 16: Death                         | 140           |
| 7  | 18-Jul-18          | 24 weeks  | Negative               | 4 years  | Uganda       | Event after wk16: LTFU and not completed treatment | 143           |
| 8  | 20-Nov-17          | 24 weeks  | Negative               | 8 months | Uganda       | Event after week 16: Death                         | 152           |
| 9  | 20-Dec-17          | 24 weeks  | Positive               | 1 years  | Zambia       | Event after week 16: Death                         | 162           |
| 10 | 05-Sep-17          | 16 weeks  | Positive               | 11 years | Zambia       | Event after week 16: TB event                      | 171           |
| 11 | 03-Feb-17          | 24 weeks  | Positive               | 1 year   | Uganda       | Event after week 16: Death                         | 186           |
| 12 | 09-Jul-18          | 16 weeks  | Negative               | 2 years  | Uganda       | Event after week 16: Death                         | 198           |
| 13 | 02-Jun-17          | 24 weeks  | Negative               | 7 years  | Uganda       | Event after week 16: Death                         | 203           |
| 14 | 03-Apr-17          | 16 weeks  | Negative               | 1 year   | Zambia       | Event after week 16: TB event                      | 204           |
| 15 | 23-Dec-16          | 16 weeks  | Negative               | 1 year   | Uganda       | Official treatment restart                         | 209           |

| #  | Randomisation Date | Treatment | HIV status/age/country | Age      | Site country | mITT unfavourable reason      | Days to event |
|----|--------------------|-----------|------------------------|----------|--------------|-------------------------------|---------------|
| 16 | 09-Nov-16          | 16 weeks  | Positive               | 9 months | Zambia       | Event after week 16: Death    | 214           |
| 17 | 27-Jun-18          | 24 weeks  | Negative               | 6 months | Uganda       | Official treatment restart    | 219           |
| 18 | 09-Oct-17          | 24 weeks  | Positive               | 1 year   | Zambia       | Event after week 16: TB event | 221           |
| 19 | 05-Apr-17          | 24 weeks  | Negative               | 1 year   | Uganda       | Event after week 16: Death    | 227           |
| 20 | 16-Nov-17          | 16 weeks  | Negative               | 7 months | Zambia       | Event after week 16: Death    | 229           |
| 21 | 22-May-18          | 24 weeks  | Negative               | 13 years | Chennai      | Event after week 16: TB event | 232           |
| 22 | 19-May-17          | 24 weeks  | Negative               | 1 year   | Uganda       | Event after week 16: Death    | 241           |
| 23 | 18-Jul-16          | 24 weeks  | Positive               | 3 months | Zambia       | Event after week 16: Death    | 257           |
| 24 | 30-Aug-17          | 16 weeks  | Negative               | 6 months | Zambia       | Event after week 16: Death    | 268           |
| 25 | 15-May-18          | 24 weeks  | Negative               | 1        | South Africa | Event after week 16: TB event | 274           |
| 26 | 24-May-17          | 24 weeks  | Negative               | 2 months | Uganda       | Event after week 16: Death    | 309           |
| 27 | 14-Jun-18          | 16 weeks  | Negative               | 2 years  | South Africa | Event after week 16: TB event | 318           |
| 28 | 03-May-18          | 24 weeks  | Negative               | 2 years  | Zambia       | Event after week 16: Death    | 318           |
| 29 | 17-Jul-18          | 16 weeks  | Negative               | 0        | South Africa | Event after week 16: TB event | 329           |
| 30 | 14-Dec-16          | 24 weeks  | Negative               | 1 year   | South Africa | Event after week 16: TB event | 377           |
| 31 | 12-Jul-18          | 16 weeks  | Negative               | 9 months | Uganda       | Event after week 16: Death    | 408           |
| 32 | 11-Dec-17          | 16 weeks  | Negative               | 3 months | Zambia       | Event after week 16: TB event | 421           |

| #  | Randomisation Date | Treatment | HIV status/age/country | Age      | Site country | mITT unfavourable reason   | Days to event |
|----|--------------------|-----------|------------------------|----------|--------------|----------------------------|---------------|
| 33 | 14-Mar-17          | 24 weeks  | Positive               | 1 year   | Uganda       | Event after week 16: Death | 468           |
| 34 | 20-Apr-18          | 24 weeks  | Negative               | 10 years | Uganda       | Event after week 16: Death | 514           |

## S7: Cost-effectiveness results

The SHINE health economics analysis investigated the value of the shortened regimen in terms of healthcare cost savings and health outcomes (measured by quality-adjusted life years). Regression analysis was used to control for chance differences in demographic characteristics and symptom severity between the children in each treatment arm.

At 72 weeks, children treated for 16 weeks had similar health outcomes (QALYs were improved by 0.003 (95% CI -0.009 to 0.0144)) and reduced healthcare costs by \$17.34 (95% CI \$3.77 to \$30.91, 2019 USD) compared with those treated in the 24-week arm.

These results indicate that for every 1000 children treated with the shortened regimen, cost savings of up to \$17,000 could be achieved. These could in turn be used to improve the implementation of the shortened regimen, such as the provision of diagnostics to identify children with mild TB.

**Table S7i: Cost-effectiveness results**

| Predicted outcomes                 | Post 4-month costs only |               |               | All costs included (scenario analysis) |               |               |
|------------------------------------|-------------------------|---------------|---------------|----------------------------------------|---------------|---------------|
|                                    | mITT (base case)        | ITT           | Per protocol  | mITT (base case)                       | ITT           | Per protocol  |
| Costs – 24 weeks                   | 138.97 (5.35)           | 137.64 (5.68) | 137.79 (5.15) | 396.14 (7.66)                          | 393.81 (7.87) | 395.13 (7.58) |
| Costs – 16 weeks                   | 121.63 (4.82)           | 122.85 (5.3)  | 120 (4.74)    | 395.85 (7.74)                          | 395.3 (7.78)  | 393.97 (7.36) |
| Life years – 24 weeks              | 1.126 (0.004)           | 1.117 (0.006) | 1.126 (0.004) | 1.358 (0.004)                          | 1.347 (0.006) | 1.357 (0.004) |
| Life years – 16 weeks              | 1.132 (0.004)           | 1.123 (0.006) | 1.124 (0.004) | 1.353 (0.004)                          | 1.342 (0.006) | 1.353 (0.004) |
| QALYs – 24 weeks                   | 1.124 (0.004)           | 1.115 (0.006) | 1.132 (0.004) | 1.364 (0.004)                          | 1.354 (0.006) | 1.364 (0.004) |
| QALYs – 16 weeks                   | 1.127 (0.004)           | 1.118 (0.006) | 1.126 (0.004) | 1.356 (0.004)                          | 1.347 (0.006) | 1.356 (0.004) |
| <b>Incremental outcomes</b>        |                         |               |               |                                        |               |               |
| Costs                              | -17.34 (6.92)           | -14.79 (7.13) | -17.8 (6.87)  | -0.3 (10.68)                           | 1.49 (10.78)  | -1.16 (10.5)  |
| Life years                         | 0.006 (0.006)           | 0.006 (0.008) | 0.006 (0.006) | 0.006 (0.006)                          | 0.007 (0.009) | 0.007 (0.006) |
| QALYs                              | 0.003 (0.006)           | 0.004 (0.008) | 0.003 (0.006) | 0.003 (0.006)                          | 0.004 (0.009) | 0.003 (0.006) |
| <b>Cost-effectiveness outcomes</b> |                         |               |               |                                        |               |               |
| Cost-per-QALY                      | Dominant                | Dominant      | Dominant      | Dominant                               | 342           | Dominant      |

QALYs = Quality-adjusted life years; mITT = modified intention to treat; ITT = intention to treat. Standard errors in parentheses. Dominant cost-per-QALY indicates the intervention improves QALYs and reduces healthcare costs.

**Table S7ii: Unit cost estimates**

| Healthcare resource                                 | Country               | Unit cost (\$US) | Source                                                             |
|-----------------------------------------------------|-----------------------|------------------|--------------------------------------------------------------------|
| <i>Health service use</i>                           |                       |                  |                                                                    |
| Clinic visit                                        | South Africa          | 13.70            | WHO Choice (1) – Cost per outpatient visit Health Centre (No Beds) |
|                                                     | Uganda                | 2.54             |                                                                    |
|                                                     | Zambia                | 4.34             |                                                                    |
|                                                     | India                 | 3.78             |                                                                    |
| Hospital outpatient visit                           | South Africa          | 19.27            | WHO Choice (1) – Cost per outpatient visit Primary Hospital        |
|                                                     | Uganda                | 3.58             |                                                                    |
|                                                     | Zambia                | 6.09             |                                                                    |
|                                                     | India                 | 5.33             |                                                                    |
| Hospital bed day                                    | South Africa          | 99.39            | WHO Choice (1) – Cost per bed day Primary Hospital                 |
|                                                     | Uganda                | 9.36             |                                                                    |
|                                                     | Zambia                | 15.98            |                                                                    |
|                                                     | India                 | 17.98            |                                                                    |
| <i>Diagnostics</i>                                  |                       |                  |                                                                    |
| Tuberculin skin test                                | All countries         | 4.47             | Kim et al. (2018) (2)                                              |
| IGRA blood test                                     | South Africa          | 67.51            | Kim et al. (2018) (2)                                              |
|                                                     | Uganda, Zambia, India | 38.95            | Little et al. (2015) (3)                                           |
| Chest x-ray                                         | South Africa          | 23.02            | Kim et al. (2018) (2)                                              |
|                                                     | Uganda, Zambia        | 7.32             | Vassall et al. (2011) (4)                                          |
|                                                     | India                 | 3.07             | Pande et al. (2015) (5)                                            |
| GeneXpert / GeneXpert Ultra                         | South Africa          | 22.86            | Sinanovic et al. (2015) (6)                                        |
|                                                     | Uganda, Zambia, India | 24.68            | Khaparde et al. (2017) (7)                                         |
| Genotype MTBDRplus                                  | All countries         | 27.46            | Cunname et al. (2016) (8)                                          |
| Liquid culture                                      | All countries         | 11.52            | Shah et al. (2013) (9)                                             |
| Löwenstein–Jensen medium                            | All countries         | 24.30            | Chihota et al. (2010) (10)                                         |
| Drug susceptibility test                            | South Africa          | 33.95            | Cunname et al. (2016) (8)                                          |
|                                                     | Uganda, Zambia, India | 27.71            | Khaparde et al. (2017) (7)                                         |
| Rapid HIV test                                      | South Africa          | 7.95             | Pooran et al. (2013) (11)                                          |
|                                                     | Uganda                | 5.08             | Asiimwe et al. (2017) (12)                                         |
|                                                     | Zambia                | 4.48             | Mwenge et al. (2017) (13)                                          |
|                                                     | India                 | 8.20             | Kundu et al. (2015) (14)                                           |
| Biochemistry                                        | South Africa          | 39.16            | Pooran et al. (2013) (11)                                          |
|                                                     | Uganda, Zambia        | 13.53            | Kundu et al. (2015) (14)                                           |
| Haematology                                         | South Africa          | 10.41            | Philips et al. (2020) (15)                                         |
|                                                     | Uganda, Zambia        | 9.54             | Barnabas et al. (2020) (16)                                        |
|                                                     | India                 | 10.38            | Venkatesh et al. (2013) (17)                                       |
| Viral load test                                     | All countries         | 22               | Philips et al. (2020) (15)                                         |
| <i>Medication (price per tab)</i>                   |                       |                  |                                                                    |
| Isoniazid 50mg, Rifampicin 75mg, Pyrazinamide 150mg | All countries         | 0.04             | Stop TB Partnership Medicines Catalog (2020) (18)                  |
| Ethambutol 100mg                                    | All countries         | 0.23             | Stop TB Partnership Medicines Catalog (2020) (18)                  |

| Healthcare resource                                                             | Country       | Unit cost (\$US) | Source                                                  |
|---------------------------------------------------------------------------------|---------------|------------------|---------------------------------------------------------|
| Isoniazid 50mg,<br>Rifampicin 75mg                                              | All countries | 0.04             | Stop TB Partnership<br>Medicines Catalog (2020)<br>(18) |
| Isoniazid 75mg,<br>Rifampicin 150mg,<br>Pyrazinamide 400mg,<br>Ethambutol 275mg | All countries | 0.08             | Stop TB Partnership<br>Medicines Catalog (2020)<br>(18) |
| Isoniazid 75mg,<br>Rifampicin 150mg                                             | All countries | 0.04             | Stop TB Partnership<br>Medicines Catalog (2020)<br>(18) |
| Pyrazinamide 150mg                                                              | All countries | 0.09             | Stop TB Partnership<br>Medicines Catalog (2020)<br>(18) |
| Rifampicin 150mg                                                                | All countries | 0.06             | Stop TB Partnership<br>Medicines Catalog (2020)<br>(18) |
| Levofloxacin 150mg                                                              | All countries | 0.13             | Stop TB Partnership<br>Medicines Catalog (2020)<br>(18) |
| Terizidone 250mg                                                                | All countries | 1.75             | Stop TB Partnership<br>Medicines Catalog (2020)<br>(18) |

All estimates inflated from base year to 2019 USD.

### Unit cost bibliography

1. World Health Organization. WHO-CHOICE [Internet]. [cited 2020 Jul 13]. Available from: <http://www.who.int/choice/cost-effectiveness/en/>
2. Kim H-Y, Hanrahan CF, Martinson N, Golub JE, Dowdy DW. Cost-effectiveness of universal isoniazid preventive therapy among HIV-infected pregnant women in South Africa. *Int J Tuberc Lung Dis* [Internet]. 2018 Dec 1;22(12):1435–42. Available from: <https://www.ingentaconnect.com/content/10.5588/ijtld.18.0370>
3. Little KM, Pai M, Dowdy DW. Costs and Consequences of Using Interferon- $\gamma$  Release Assays for the Diagnosis of Active Tuberculosis in India. Rengarajan J, editor. *PLoS One* [Internet]. 2015 Apr 28;10(4):e0124525. Available from: <https://dx.plos.org/10.1371/journal.pone.0124525>
4. Vassall A, van Kampen S, Sohn H, Michael JS, John KR, den Boon S, et al. Rapid Diagnosis of Tuberculosis with the Xpert MTB/RIF Assay in High Burden Countries: A Cost-Effectiveness Analysis. *PLoS Med*. 2011;8(11):e1001120.
5. Pande T, Pai M, Khan FA, Denkinger CM. Use of chest radiography in the 22 highest tuberculosis burden countries. *Eur Respir J* [Internet]. 2015 Dec;46(6):1816–9. Available from: <http://erj.ersjournals.com/lookup/doi/10.1183/13993003.01064-2015>
6. Sinanovic E, Ramma L, Vassall A, Azevedo V, Wilkinson L, Ndjeka N, et al. Impact of reduced hospitalisation on the cost of treatment for drug-resistant tuberculosis in South Africa. *Int J Tuberc Lung Dis* [Internet]. 2015 Feb 1;19(2):172–8. Available from: <http://openurl.ingenta.com/content/xref?genre=article&issn=1027-3719&volume=19&issue=2&spage=172>

7. Khaparde S, Raizada N, Nair SA, Denkinger C, Sachdeva KS, Paramasivan CN, et al. Scaling-up the Xpert MTB/RIF assay for the detection of tuberculosis and rifampicin resistance in India: An economic analysis. Neyrolles O, editor. PLoS One [Internet]. 2017 Sep 7;12(9):e0184270. Available from: <https://dx.plos.org/10.1371/journal.pone.0184270>
8. Cunnama L, Sinanovic E, Ramma L, Foster N, Berrie L, Stevens W, et al. Using Top-down and Bottom-up Costing Approaches in LMICs: The Case for Using Both to Assess the Incremental Costs of New Technologies at Scale. Health Econ [Internet]. 2016 Feb;25:53–66. Available from: <http://doi.wiley.com/10.1002/hec.3295>
9. Shah M, Chihota V, Coetzee G, Churchyard G, Dorman SE. Comparison of laboratory costs of rapid molecular tests and conventional diagnostics for detection of tuberculosis and drug-resistant tuberculosis in South Africa. BMC Infect Dis [Internet]. 2013 Dec 29;13(1):352. Available from: <https://bmcinfectdis.biomedcentral.com/articles/10.1186/1471-2334-13-352>
10. Chihota VN, Grant AD, Fielding K, Ndibongo B, van Zyl A, Muirhead D, et al. Liquid vs. solid culture for tuberculosis: performance and cost in a resource-constrained setting. Int J Tuberc Lung Dis. 2010;14(8):1024–31.
11. Pooran A, Pieterse E, Davids M, Theron G, Dheda K. What is the Cost of Diagnosis and Management of Drug Resistant Tuberculosis in South Africa? Caylà JA, editor. PLoS One [Internet]. 2013 Jan 18;8(1):e54587. Available from: <https://dx.plos.org/10.1371/journal.pone.0054587>
12. Asiimwe S, Ross JM, Arinaitwe A, Tumusiime O, Turyamureeba B, Roberts DA, et al. Expanding HIV testing and linkage to care in southwestern Uganda with community health extension workers. J Int AIDS Soc [Internet]. 2017 Jul;20:21633. Available from: <http://doi.wiley.com/10.7448/IAS.20.5.21633>
13. Mwenge L, Sande L, Mangenah C, Ahmed N, Kanema S, D'Elbée M, et al. Costs of facility-based HIV testing in Malawi, Zambia and Zimbabwe. Fox MP, editor. PLoS One [Internet]. 2017 Oct 16;12(10):e0185740. Available from: <https://dx.plos.org/10.1371/journal.pone.0185740>
14. Kundu D, Katre V, Singh K, Deshpande M, Nayak P, Khaparde K, et al. Innovative social protection mechanism for alleviating catastrophic expenses on multidrug-resistant tuberculosis patients in Chhattisgarh, India. WHO South-East Asia J Public Heal [Internet]. 2015;4(1):69. Available from: <http://www.who-seajph.org/text.asp?2015/4/1/69/206624>
15. Phillips AN, Bansi-Matharu L, Venter F, Havlir D, Pozniak A, Kuritzkes DR, et al. Updated assessment of risks and benefits of dolutegravir versus efavirenz in new antiretroviral treatment initiators in sub-Saharan Africa: modelling to inform treatment guidelines. Lancet HIV [Internet]. 2020 Mar;7(3):e193–200. Available from: <https://linkinghub.elsevier.com/retrieve/pii/S235230181930400X>
16. Barnabas R V, Szpiro AA, van Rooyen H, Asiimwe S, Pillay D, Ware NC, et al. Community-based antiretroviral therapy versus standard clinic-based services for HIV in South Africa and Uganda (DO ART): a randomised trial. Lancet Glob Heal [Internet]. 2020 Oct;8(10):e1305–15. Available from: <https://linkinghub.elsevier.com/retrieve/pii/S2214109X20303132>
17. Venkatesh KK, Becker JE, Kumarasamy N, Nakamura YM, Mayer KH, Losina E, et al. Clinical Impact and Cost-Effectiveness of Expanded Voluntary HIV Testing in India. Tang J, editor. PLoS One [Internet]. 2013 May 31;8(5):e64604. Available from: <https://dx.plos.org/10.1371/journal.pone.0064604>
18. Stop TB Partnership. Global Drug Facility Medicines Catalog. Geneva; 2020.



S8: Primary endpoint stratified by microbiological confirmation

**Table S8i: Microbiologically confirmed**

|                                                           | 4 Month        | 6 Month        | Total           |
|-----------------------------------------------------------|----------------|----------------|-----------------|
| <b>Randomised</b>                                         | <b>602</b>     | <b>602</b>     | <b>1204</b>     |
| <b>Total in Analysis</b>                                  | <b>85</b>      | <b>80</b>      | <b>165</b>      |
| <b>Unassessable</b>                                       | 7              | 6              | 13              |
| Favourable                                                | <b>76 (89)</b> | <b>74 (92)</b> | <b>103 (90)</b> |
| Unfavourable                                              | <b>2 (2)</b>   | <b>0 (0)</b>   | <b>2 (1)</b>    |
| <b>Total Assessable</b>                                   | <b>78</b>      | <b>74</b>      | <b>152</b>      |
| Difference from control in unfavourable rate (Unadjusted) | - 0.9%         |                |                 |
| 95% confidence interval (Unadjusted)                      | (-3.4 to 1.6)  |                |                 |

**Table S8ii: Not microbiologically confirmed**

|                                                           | 4 Month         | 6 Month         | Total            |
|-----------------------------------------------------------|-----------------|-----------------|------------------|
| <b>Randomised</b>                                         | <b>602</b>      | <b>602</b>      | <b>1204</b>      |
| <b>Total in Analysis</b>                                  | <b>517</b>      | <b>522</b>      | <b>1039</b>      |
| <b>Unassessable</b>                                       | 23              | 23              | 46               |
| Favourable                                                | <b>480 (92)</b> | <b>481 (92)</b> | <b>1008 (98)</b> |
| Unfavourable                                              | <b>14 (3)</b>   | <b>18 (4)</b>   | <b>32 (3)</b>    |
| <b>Total Assessable</b>                                   | <b>494</b>      | <b>499</b>      | <b>993</b>       |
| Difference from control in unfavourable rate (Unadjusted) | -0.7%           |                 |                  |
| 95% confidence interval (Unadjusted)                      | (-3.0 to 1.4)   |                 |                  |

S9: Primary endpoint results by PP and ITT

Table 9i Primary efficacy analysis results (PP)

|                                                                         | 16 weeks             | 24 weeks        | Total            |
|-------------------------------------------------------------------------|----------------------|-----------------|------------------|
| <b>Randomised</b>                                                       | <b>602</b>           | <b>602</b>      | <b>1204</b>      |
| <b>Unassessable</b>                                                     | 39                   | 44              | 83               |
| Favourable                                                              | <b>549 (98)</b>      | <b>541 (97)</b> | <b>1090 (97)</b> |
| Unfavourable                                                            | <b>14 (2)</b>        | <b>17 (3)</b>   | <b>31 (3)</b>    |
| <b>Total included in analysis (Assessable)</b>                          | <b>563</b>           | <b>558</b>      | <b>1121</b>      |
| Difference from control in unfavourable rate<br>(CMH weights, Adjusted) | -0.6%                |                 |                  |
| 95% confidence interval (Adjusted †)                                    | <b>(-2.4 to 1.3)</b> |                 |                  |
| Difference from control in unfavourable rate (Unadjusted)               | -0.6%                |                 |                  |
| 95% confidence interval (Unadjusted)                                    | <b>(-2.5 to 1.4)</b> |                 |                  |

Data presented as number of participants (%), unless otherwise stated. CMH: Cochran–Mantel–Haenszel. \*Unadjusted is displayed in figure 2; † Adjusted for centre, age (over/under 3 years), HIV status and ethambutol use.

**Table 9ii Primary efficacy analysis results (ITT)**

|                                                            | 16 weeks        | 24 weeks        | Total            |
|------------------------------------------------------------|-----------------|-----------------|------------------|
| <b>Randomised</b>                                          | <b>602</b>      | <b>602</b>      | <b>1204</b>      |
| <b>Unassessable</b>                                        | 0               | 0               | 0                |
| Favourable                                                 | <b>558 (93)</b> | <b>558 (93)</b> | <b>1116 (93)</b> |
| Unfavourable                                               | <b>44 (7)</b>   | <b>44 (7)</b>   | <b>88 (7)</b>    |
| <b>Total (Included in analysis) Assessable</b>             | <b>602</b>      | <b>602</b>      | <b>1204</b>      |
| Difference from control in unfavourable rate (Unadjusted)* | 0%              |                 |                  |
| 95% confidence interval (Unadjusted)                       | (-2.9 to 2.9)   |                 |                  |

Data presented as number of participants (%), unless otherwise stated. CMH: Cochran–Mantel–Haenszel.

Figure S1: Adherence - the number of daily doses taken in each phase for all children

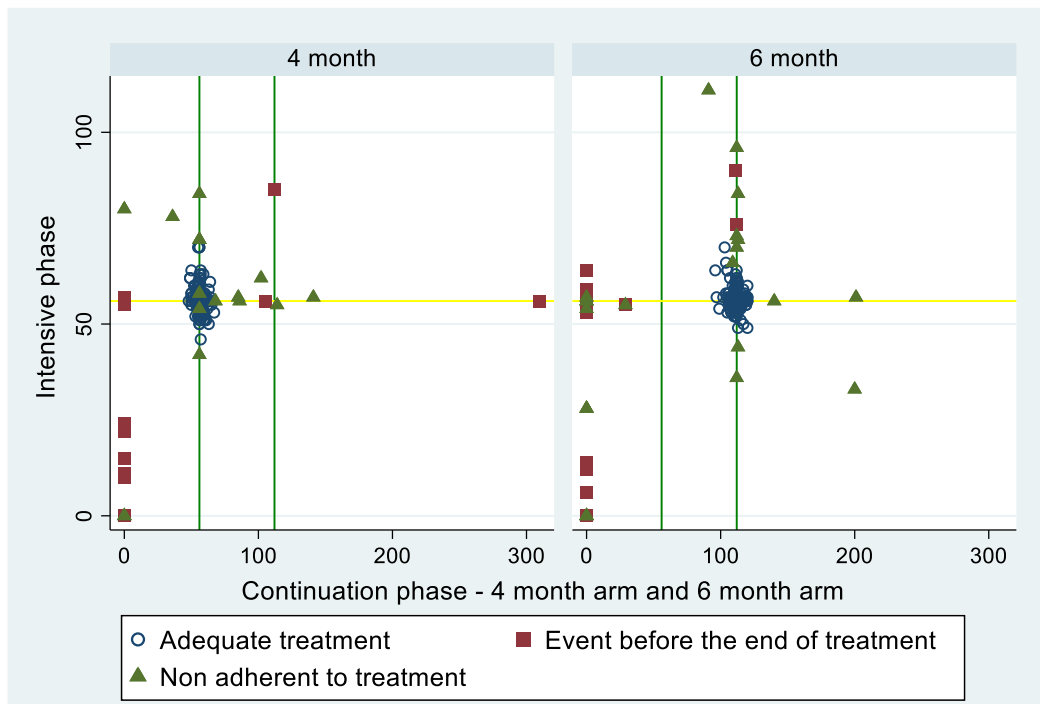

Y-axis is number of daily doses taken during intensive phase; x-axis is total number of daily doses taken during continuation phase. Green vertical lines indicate 16 weeks and 24 weeks of daily doses respectively. The yellow horizontal lines indicate 8 weeks of the intensive phase of treatment (56 days). The left panel represents drug intake in the 16-week arm, the right panel – drug intake in the 24-week arm. The figure demonstrates that the majority of children were adherent to the allocated duration of treatment.

Figure S2: Time to unfavourable outcome (mITT)

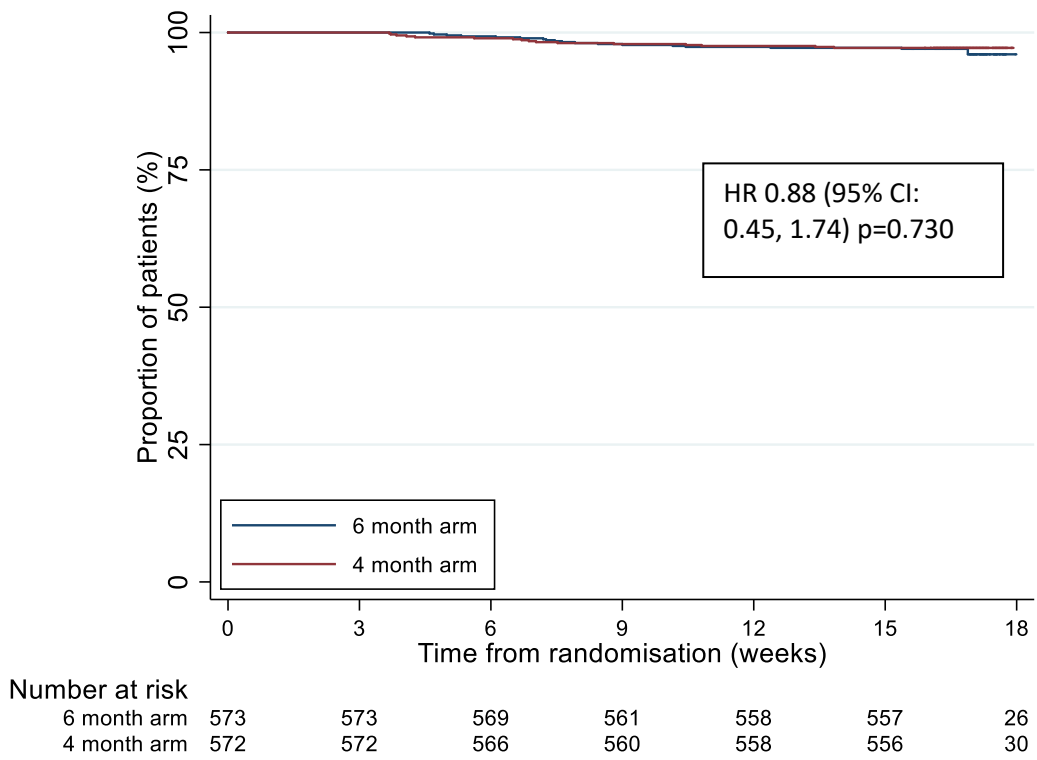

Figure S3: Time to death (ITT)

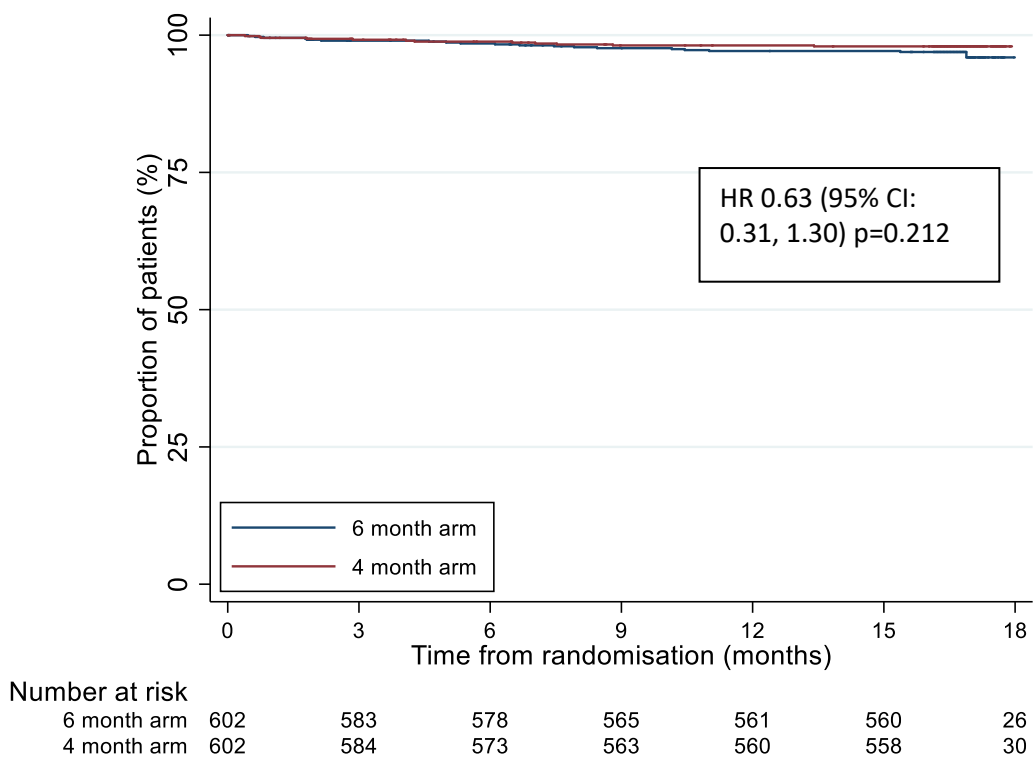

Figure S4: Subgroup Analyses of Primary Efficacy Endpoint

“Lymph node TB” was defined as: Mixed TB (cough OR abnormal CXR) AND abnormal peripheral lymph node OR Lymph node presentation (no cough, but abnormal peripheral lymph node). “Not lymph node TB” was defined as: Respiratory presentation (cough OR abnormal CXR) OR Other presentation (no cough AND NO abnormal peripheral lymph node)

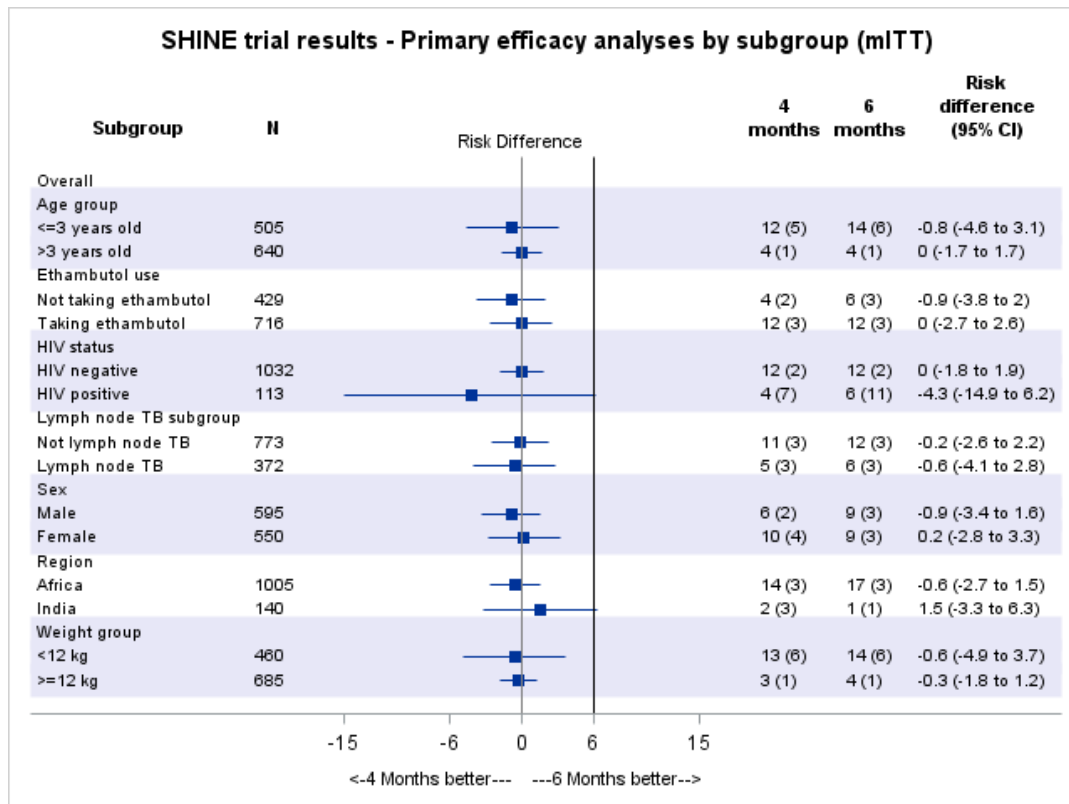

Supplement: EMS140778-supplement-Supplement.pdf [file EMS140778-supplement-Supplement.pdf]
